# Supplementary material
Source: Springer Nature journal article supplement (https://www.springermedizin.de/resource/supplementary/12891_2013_1837_MOESM4_ESM.pdf/9508604)

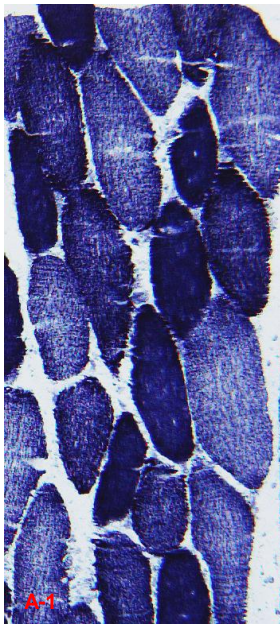

A-1

Naive

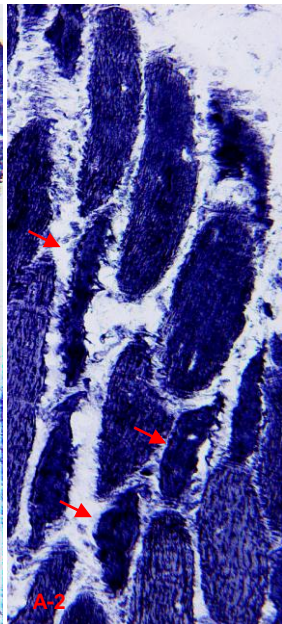

A-2

CIA

NADH-TR

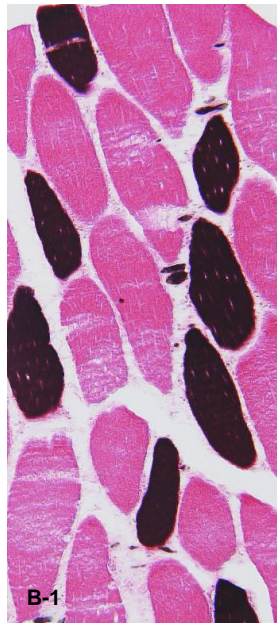

B-1

Naive

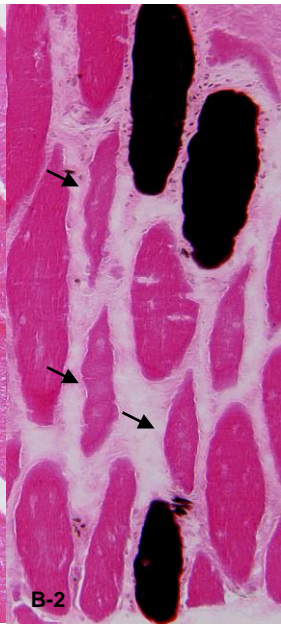

B-2

CIA

ATPase

Supplement: MOESM4 [file 9508604]
